# Supplementary material for: Comparative Analysis of Transcriptomic Changes including mRNA and microRNA Expression Induced by the Xenoestrogens Zearalenone and Bisphenol A in Human Ovarian Cells
Source: MDPI journal article supplement (doi:10.3390/toxins15020140), 2023-02-09
Supplement: s1 [file s1]

# Supplementary Materials: Comparative Analysis of Transcriptomic Changes including mRNA and microRNA Expression Induced by the Xenoestrogens Zearalenone and Bisphenol A in Human Ovarian Cells

Éva Márton, Alexandra Varga, András Penyige, Zsuzsanna Birkó, István Balogh, Bálint Nagy and Melinda Szilágyi

**Table S9.** Primer sequences of 18 genes applied in the qPCR experiments.

|                | Forward                  | Reverse                 |
|----------------|--------------------------|-------------------------|
| <i>RBBP8NL</i> | CGCATCTTCATCCTCACCA      | CCTCCTTCAAGGTCTCGTTCT   |
| <i>MYC</i>     | TGCTCCATGAGGAGACACC      | CTTTTCCACAGAAACAACATCG  |
| <i>EGR1</i>    | AGCCCTACGAGCACCTGAC      | GGTTTGGCTGGGGTAACTG     |
| <i>NOLC1</i>   | AAGACAGCAGTGATGAGTCTGATT | AGCTCTCTGCTGCTTTCTTTG   |
| <i>RRP12</i>   | ACCATCCGGCCCTACCTA       | CCTGAGGACTGGCACACA      |
| <i>BLNK</i>    | AGAGAGCCCTGCTGACGA       | CGAGTGCTCATCTGGATTTTC   |
| <i>TGM1</i>    | GGACTCAGTACTGCGGTTGC     | TGGAGATGGCGTGGTAGG      |
| <i>KRT4</i>    | TTTGCCTCCTTCATCGACA      | TCAAGGTTTTTGCTGGAGGT    |
| <i>BMF</i>     | GAGACTCTCTCCTGGAGTCACC   | CCTCTGGTTGGAACACATCA    |
| <i>CD24</i>    | ATGGGCAGAGCAATGGTG       | CCAGTTGTTGTTTCACTGGAAT  |
| <i>NOTCH3</i>  | CTTCCTGCGATCAGGACATC     | CACTCATCCACATCGCGGG     |
| <i>GBP3</i>    | CCAGCGATCCAGCGAAAGAA     | GGGCCTGTCATGTGGATCTC    |
| <i>MYBL1</i>   | AGGATCGGGGAGAAGGAGCAT    | TCGGCATACTGAAGGTCATCATC |
| <i>GREB1</i>   | TCTTGACAATTCCATCGAG      | GTCCACTCGGCTACCACCT     |
| <i>CA12</i>    | GTTTCTCCTGACCAACAATGG    | CGTGGCACTGTAGCGAGAC     |
| <i>DEPTOR</i>  | TCATGGCATCTGAATTCCTG     | ATGGGTGCTTGTTGGACAC     |
| <i>AGT</i>     | TGCCGTTGTTCTGGGTACTA     | TGTATGTACACCCGGTCACCT   |
| <i>GAPDH</i>   | CACCCACTCCTCCACCTTT      | GCCAAATTCGTTGTCATACCA   |
