# Supplementary material for: Comparative Analysis of Transcriptomic Changes including mRNA and microRNA Expression Induced by the Xenoestrogens Zearalenone and Bisphenol A in Human Ovarian Cells
Source: MDPI journal article supplement (doi:10.3390/toxins15020140), 2023-02-09
Supplement: s1 [file s1]

# Supplementary Materials: Comparative Analysis of Transcriptomic Changes including mRNA and microRNA Expression Induced by the Xenoestrogens Zearalenone and Bisphenol A in Human Ovarian Cells

Éva Márton, Alexandra Varga, András Penyige, Zsuzsanna Birkó, István Balogh, Bálint Nagy and Melinda Szilágyi

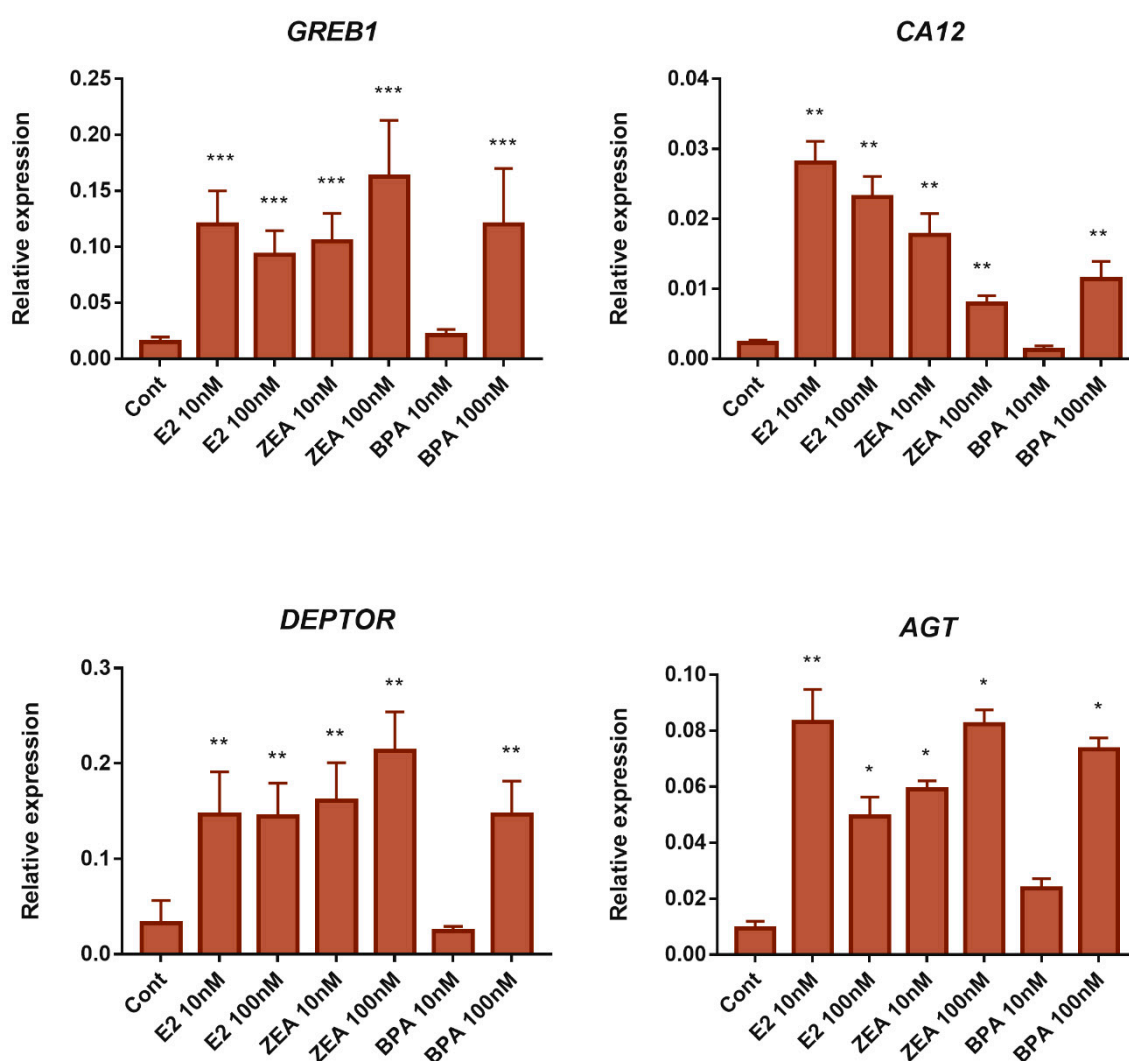

**Supplementary Figure S1** Optimization of E2, ZEA and BPA dose for the transcriptomic studies by qPCR. Gene expression is presented as relative expression normalized to *GAPDH*. \* $p < 0.05$ ; \*\* $p < 0.01$ ; \*\*\* $p < 0.001$ . One-way ANOVA, Dunnet-test.

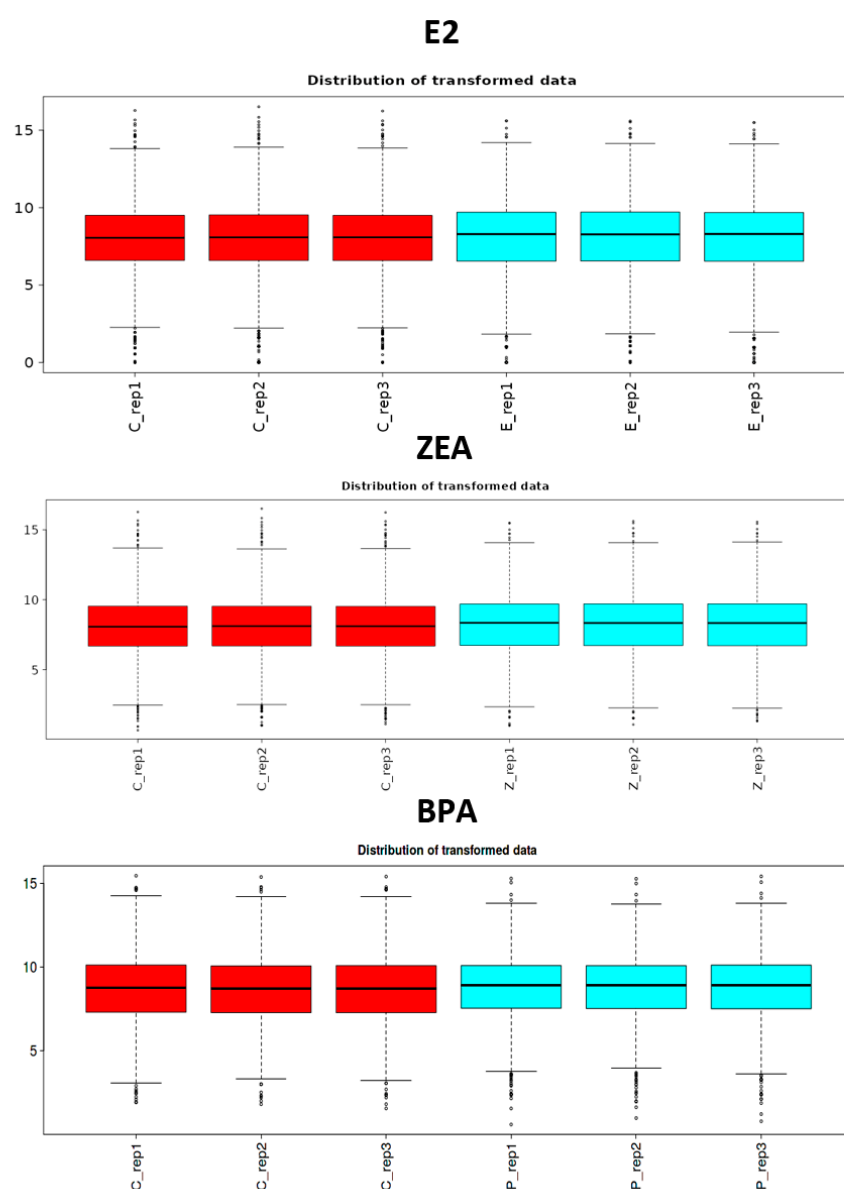

**Supplementary Figure S2** The distribution of FPKM values of differently expressed mRNAs in response to E2, ZEA and BPA exposure according to the mRNA-seq data (iDEP.96).

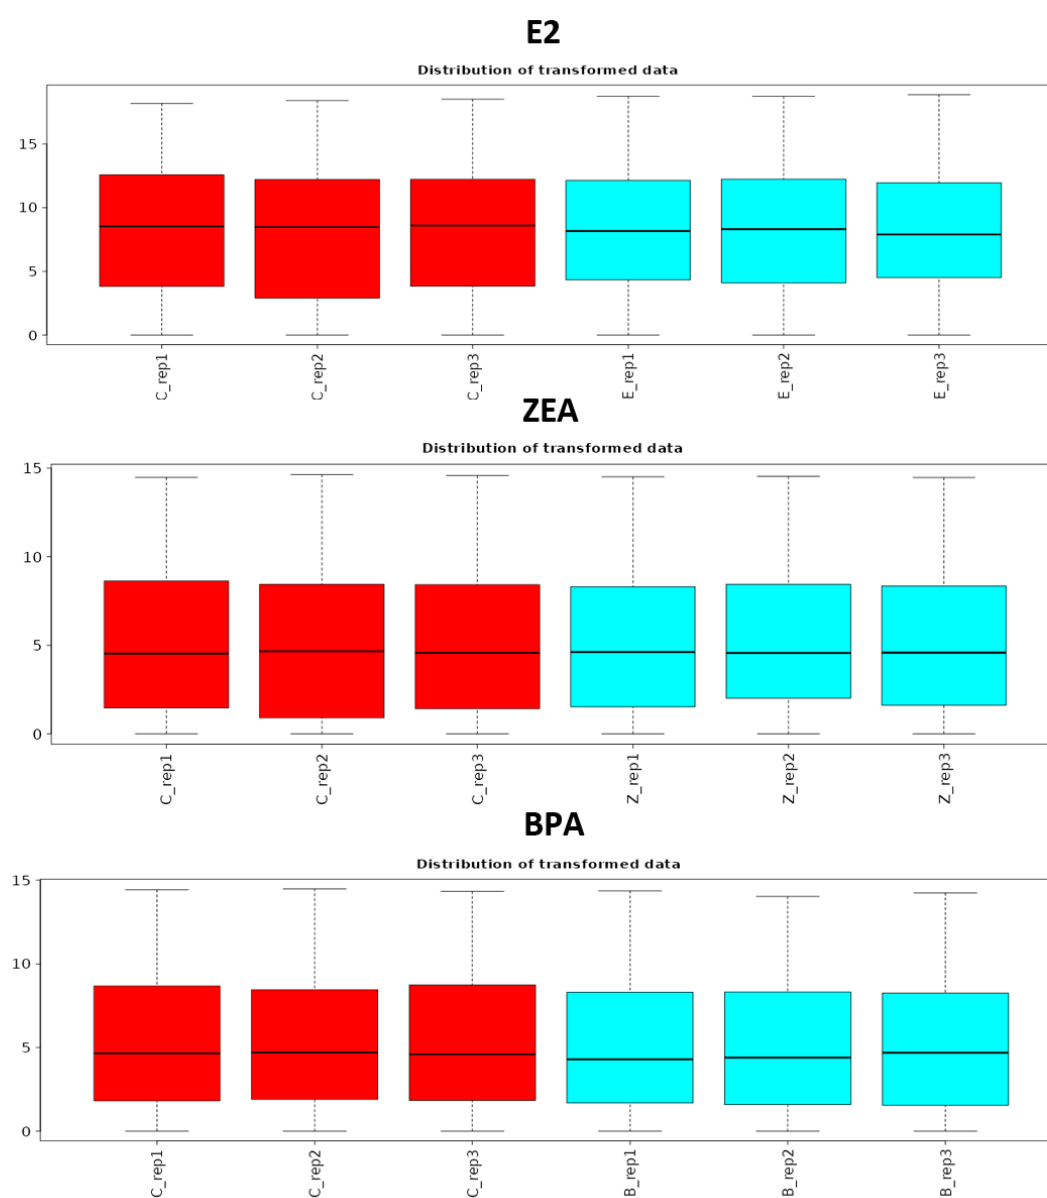

**Supplementary Figure 3** The distribution of FPKM values of differently expressed miRNAs in response to E2, ZEA and BPA according to the miRNA-seq data (iDEP.96).
